# Supplementary material for: Decoding the impact of MMP1+ malignant subsets on tumor-immune interactions: insights from single-cell and spatial transcriptomics
Source: Springer Nature journal article supplement (doi:10.1038/s41420-025-02503-y), 2025-05-20
Supplement: MOESM1 [file 41420_2025_2503_MOESM1_ESM.pdf]

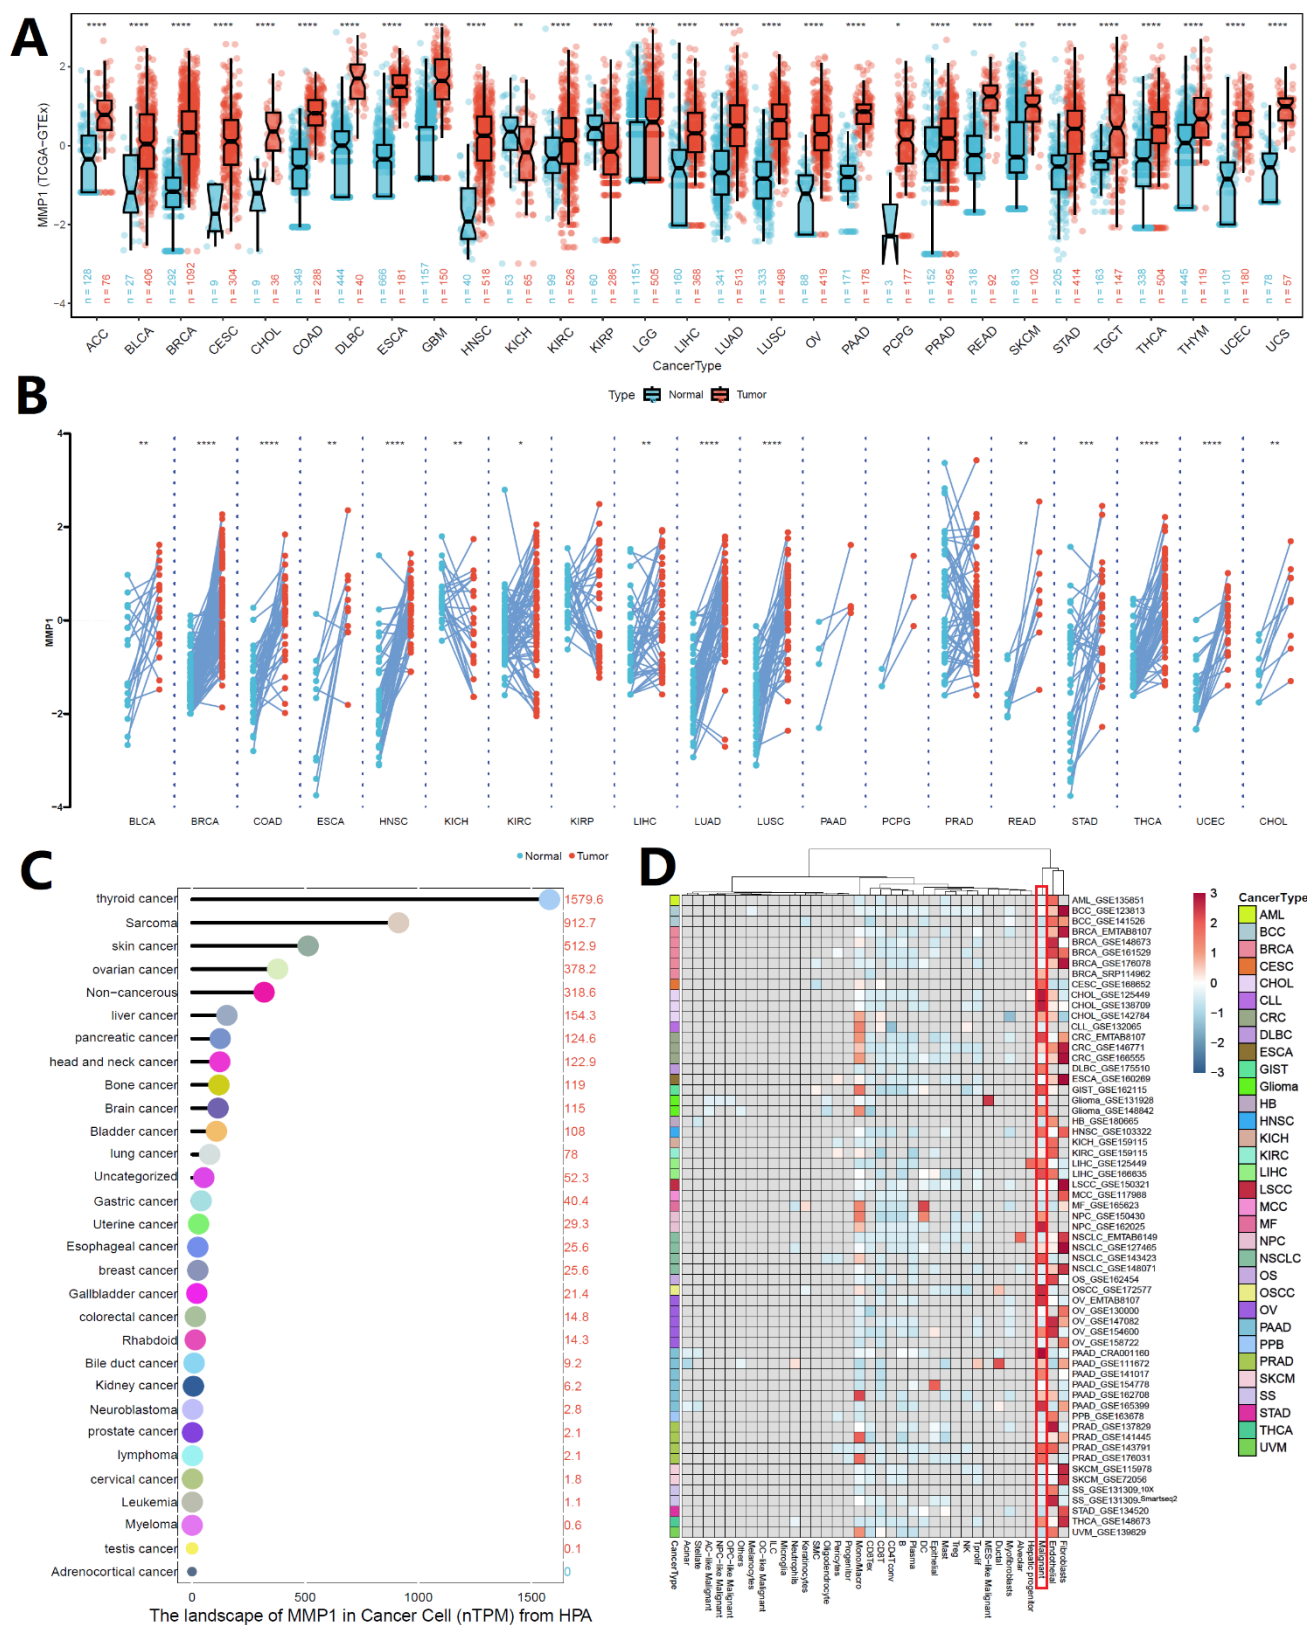

**Fig. S1. Pan-cancer analysis of MMP1 expression**

- (A) Differential expression of MMP1 in tumor tissues compared to normal tissues.
- (B) Differential expression of MMP1 between tumor tissues and paired adjacent normal tissues.
- (C) MMP1 expression in various tumor cells based on the HPA database.
- (D) MMP1 expression in various tumor single-cell database.
